# Supplementary material
Source: PubMed Central journal article supplement (PMC2665117)
Supplement: M900719200_1.pdf [file M900719200_1.pdf]

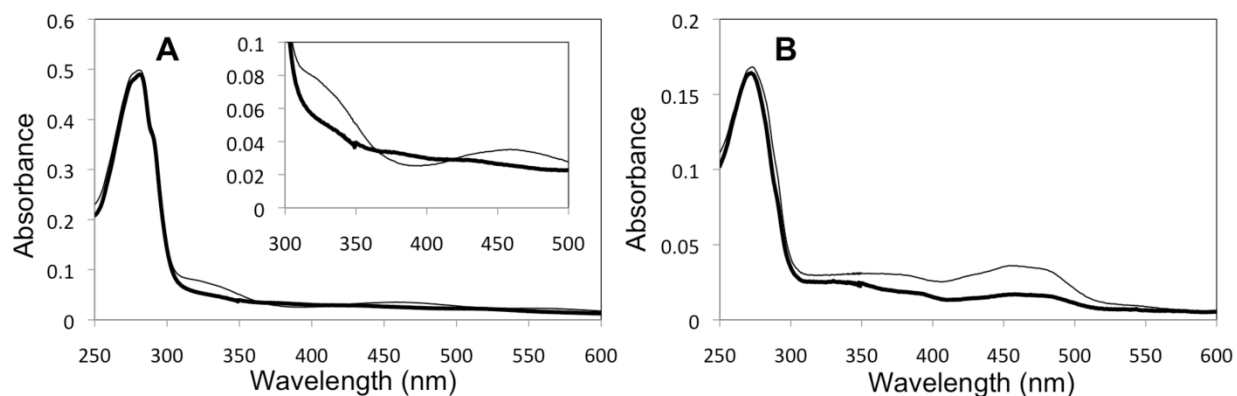

Supplemental Figure 1. Spectra of reduced and oxidized KshA and KshB. UV-vis spectra of KshA (A) and KshB (B) in reduced and oxidized forms are shown as heavy and light lines, respectively. All spectra were recorded in 0.1M potassium phosphate, pH 7.0. Reduced spectra were collected anaerobically. Oxidized KshA and reduced KshB were prepared by adding an excess of potassium ferricyanide or NADH respectively before buffer exchange by gel filtration chromatography.

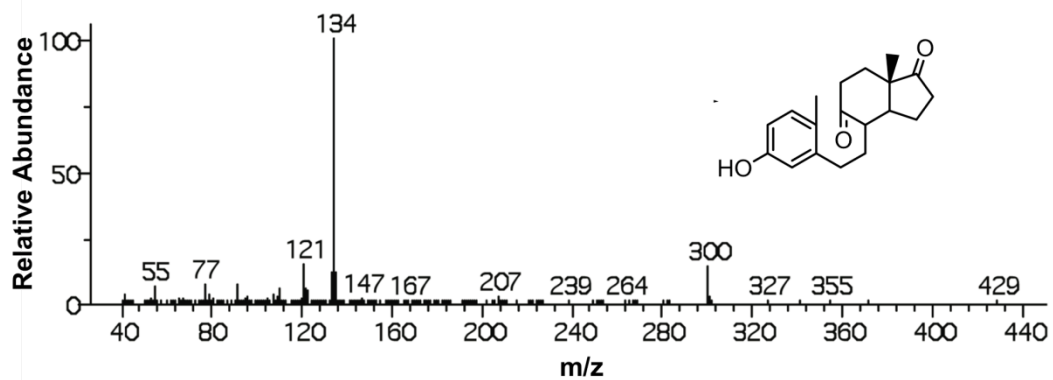

Supplemental Figure 2. Fragmentation pattern of KshA-catalyzed transformation of ADD. GC-MS  $R_t$  = 15.32 min; EI-MS (70 eV, EI); m/z: 300 ( $[M^+]$ , 15%), 134 (100%), 121 (15%), 77 (8%), 55 (6%). This retention time and fragmentation pattern correspond to those of authentic 3-hydroxy-9,10-seconandrost-1,3,5(10)-triene-9,17-dione (HSA).

```

NDO-98164 ----- -MN--YNN-K -ILV-SES-G LSKQHLIHGD EELFQHELKT IFARNWFLFT HDLSLIPAPGD YVTAKMGIDE 63
NBDO-J5765 ----- -Y---Q -NLV-SEA-G LTQKLLIHGD KELFQHELKT IFARNWFLFT HDLSLIPSPGD YVKAKMGVDE 59
BPDO-B1 ----- -TLV-DTV-N ASQSRQVFW EDVYALEIER IFSRAWMLMG HESLVPKPGD FITTYMAEDK 57
RHDO-CHY-1 ----- -MS--GDT -TLV-DTV-N ASQSRQVFW RDVYDLEIER IFSRAWMLMG HESLVPKPGD FITTYMAEDK 62
BPDO-RHA1 ----- -WA--DAD-I AELV-DER-T GRLLDPRITYD EALYEQLEIR IFGRSWLLMG HETQIPKAGD FMTNYMGEDP 64
CUMDO-IP01 ----- -WS--DEE-I KALV-DEE-K GLLDPRIFSD ODLYEIELEIR VFGARSWLLMG HETQIPKAGD YLTTYMGEDP 65
NDO-12038 ----- -N -LSNELRQTL QKGLHDVNSD WTVPAAIIND PEVHDVERER IFGHAWVFLA HESLIPKAGD YVYVYLEDQ 70
CARDO-CA10 ----- -MA NVDEAILKRV KQWA ----- --P---Y--- --V--DAKL- GF-RNHWPYP MFSKEINECE PTKLKLIGEN 52
OMO-86 ----- -AKTQ SQYQ ----- --P---Y--- --K--DAAW- GF-INHWYPA LFTHLEEDQ VQGIQICVP 52
KshA-H37Rv ----- -MSTD TSGVG----- --VREI DAG--ALPT RYAR-GWHCL GVAKYDELEGK PHGVEAFGTK 49

NDO-98164 VIVSRQNDGS IRAFLNVCRH RGKTLVSVEA -GNAK-GFVC SYHGWFSGSN -GELQSVPF KDLYGE--SL NKKCLGLKEV 138
NBDO-J5765 VIVSRQNDGS VRAFNLVCRH RGKTLVHAEA -GNAK-GFVC GYHGWFYGSN -GELQSVPF KELYGD--AI KKKCLGLKEV 134
BPDO-B1 VILSHQSDGT FRAFINSCTH RGNIICHADS -GNAK-AFVC NYHGWFYGSN -GSLVDVPLE SRCYHN--SL DKQKLAASKV 132
RHDO-CHY-1 IILSHQSDGT FRAFINSCTH RGNIICHADS -GNAK-AFVC NYHGWFYGSN -GSLVDVPLE SRCYHN--KL DKQELAASKV 137
BPDO-RHA1 VMVVRQKNGE IRVFLNOCRH RGMRIERSDF -GNAK-SFTC SYHGWAYDTA -GNLVNVPYE EQAF-P--GL RKEDWGPLQA 138
CUMDO-IP01 VIVVRQKDRS IKVFLNOCRH RGMRIERSDF -GNAK-SFTC TYHGWAYDTA -GNLVNVPYE KEAF-CDGCF DKADWGPLQA 141
NDO-12038 FIVCRDEGGE IRHGLNOCRH RGMQVCRADM -GNTS-HFRC PYHGWTYSNT -GSLVGVVPAK KDAY-GN-QL KKSQDWNLRK 145
CARDO-CA10 LLVNRID-GK LYCLKRDLRH RGVLVSVKV- ECKTKSTITC WYHAWTYRWE DGVLCIDLTN P-----T-SA QIGRQKLKTY 124
OMO-86 IVLRRVNGK VFALKDCLH RGVRLSEK- P-CFTKSTISC WYHGFTFDLE TGKLVTVAN P-----E-DK LIGTTQVTTY 124
KshA-H37Rv LVVFDASHGD LKVLVDGCRH MGGDLS-EGT V-KGD-EVAC PFHWRWGG- DGRCKLVVPA RRT----- -PRMARTRSW 117

NDO-98164 ARVESFHG-- F IYGCFF--D QEAP-PLMDY LGDAAWYLEP ----- -M-F KHS-G-GLEL VGPPGKVIK 192
NBDO-J5765 PRIESFHG-- F IYGCFF--D AEAP-PLIDY LGDAAWYLEP ----- -T-F KYS-G-GLEL VGPPGKVVV 188
BPDO-B1 RVETYKGG-- F IYGCFF--D PEAP-SLEDY LGEFRFYLDL ----- -I-W EGAGG-GMEL LGPPMKSLLQ 186
RHDO-CHY-1 RVETYKGG-- F IYGCFF--D PEAP-SLEDY LGEFRFYLDL ----- -I-W EGAGG-GMEL LGPPMKSLLH 191
BPDO-RHA1 RVETYKGG-- LIFANW--D ADAP-DLDTY LGEAKFYMDH ----- -M-L DRT-EAGTEA IPCIQKWI 192
CUMDO-IP01 RVDTYKGG-- LIFANW--D TEAP-DLKT Y LSAATPYMDV ----- -M-L DRT-EAVTQV ITGMQKTV 195
NDO-12038 PNLASYKGG-- LIFANW--D PHAD-SLEDY LADLKFYLDI ----- -V-L DRS-DAGLQV VGAPQRWID 200
CARDO-CA10 PVQEAACC VFIYLG--D G-D--PPP- AR-DT-PP-N ----- -F-L DDD--MEIL G--KNOIK- 168
OMO-86 PVHEVNGM IFVFEVREDD P-DEVP-L AH-DL-PF-R FPERSEQPH PLWSPSPSVL DDN--AVVH G--MHRGTG- 191
KshA-H37Rv TTDVRSGL LFWVHHDH-- EGN--PPDP- AVRIP E----- -IPE AASDE--WTD WRWNRILIEG 166

NDO-98164 ANWKAPAENF VGDAYHYV-GW THASS-LRSG E-SIFSSLAG NA-ALPEGA G-LQMTS-K -YSGMG VL---WDGYS 258
NBDO-J5765 CNWKFAAENF VGDAYHYV-GW THAAA-LRAG Q-SVFSIAG NA-KLPEGA G-LQMTS-K -YSGMG VF---WGYYS 254
BPDO-B1 CNWKVPAENF IGDGYHYV-GW THAAA-LSQI G-GELAGLAG NRADIPFDDL G-LQFTT-R -HGFGF VI---DNAA 254
RHDO-CHY-1 CNWKVPVENF VGDAYHYV-GW THAAA-LGQI G-GPLAGLAG NRA-D--D-L G-LQFTT-R -HGFGF VI---DNAA 254
BPDO-RHA1 CNWKFAAEQF CSDMYHAGTT SHLSG-ILAG L-P----- -T--E G-IQYRATW -GGHGSF FY---IGDF 246
CUMDO-IP01 CNWKFAAEQF CSDMYHAGTM AHLSG-VLSS LPPMEDLSQV KLP--S--S G-NQFRAKW -GGHGTG WF---NDDFA 260
NDO-12038 ANWKLAGDNF VGDAYHT-MM THRSM-VELG N-APPDQPA A----- -Y G-EHHT-G -HGHLG II---GPPG 259
CARDO-CA10 SNWRLAVENG FDPSHI--Y IHKDSILVKD N-DLALPLCF A----- -PGGDR KQQRV-VD DVVGRKGVYD LI---GPHV 236
OMO-86 GNWRACENG -FDNAH I--L VHKDNTI VHA M-DWVLPGL L----- -PT-SD -DCI AVV-ED -DDGPKMMQ WLF--TDKWA 257
KshA-H37Rv SNCRDIIDNV -TDMAHF-FY IHF----- -GL-PT YF----- -KNVFE G---HIASQ YLHNVRPDDV 214

NDO-98164 ----- -GVH SADLVP ELMA FG-GA-KQER LNK-EIGD-V RARIYRSHLN CTVFPNNSML TC----- 309
NBDO-J5765 ----- -GNF SADMI PDLMA FG-AA-KQEK LAK-EIGD-V RARIYRSFLN GTIFPNNSFL TG----- 305
BPDO-B1 ----- -G-L HIKR-EGWTK FL-ED-TRCE VRR-KFGP-E RERLYLGHWN CSIIPNCSFL YG----- 302
RHDO-CHY-1 ----- -A-I HRKG-DGWNK YL-ED-TRCE VRR-KFGA-D RERLYVGHWN GAIIPNCSFL YG----- 303
BPDO-RHA1 ----- -LLL AI-MGPKVTE YWTQGPAAEK ASE-RLGS-T ERGQQLMAQH MTIFPTCSFL PG----- 298
CUMDO-IP01 ----- -LLQ AI-MGPKVVD YWTKGPAER AKE-RLGK-V LPADRMAQH MTIFPTCSFL PG----- 312
NDO-12038 ----- -MPL ----- -PEFMG LP--ENIVEE LERRLTPQEV EIFRPTAFIH GTVFPNLSIG NPLMGKD-HL 314
CARDO-CA10 PVFEGTIGGE VVREGAYGEK ----- -I-VANDI S1WLPCVLKV NFPN----- 277
OMO-86 PVLE-NQELG L-KVEGLK-G ----- -RHY-RT SVVLPCVLMV ENWPE----- 294
KshA-H37Rv ----- -DDL G-----TSYGE --AHLD-SEA SYFGPSFMIN WLHNR--YGN 248

NDO-98164 ----- -SGVFK VWNPIDANTT EVWTYAIV-- E-KD-MPELD KRRLADSVQR TFGPAGFWS DBDNMETAS QNGKKYQSRD 380
NBDO-J5765 ----- -SAAFR VWNPIDENTT EVWTYAFV-- E-KD-MPELD KRRVADAVQR S1GPAGFWS DBDNMETAS QNGKKYQSSN 376
BPDO-B1 ----- -TNTFK IWHPRGPHIE EVWTYIV-- P-RD-ADPAT KSMIQREAIR TFGAGTLES DBGNMSSAT Y1NRGVI TRN 373
RHDO-CHY-1 ----- -TNTFK IWHPRGPHIE EVWTYM-- P-SD-ADPAT KSAIQREATR TFGAGTLES DBGNMSSAT YVNRGVI TRD 374
BPDO-RHA1 ----- -INTIR AWHPRGPIE EVWFTV-- D-AD-APEEM KEEYRQQLR TFSAGVFEQ DBGNMSSAT QVLRGHKARS 369
CUMDO-IP01 ----- -INTIR TWHPRGPIE EVWFTV-- D-AD-APEEM KEEYRQQLR TFSAGVFEQ DBGNMSSAT RGLRGGYKARS 383
NDO-12038 SAPTAF LTLR LWHPLGPKM EVMSFLLV-- E-KD-APDFW KDESYSYLR TFGISGFEQ DBANWRSIT RVMGGQFAT 390
CARDO-CA10 --PDMQFEW YVPIDE--NT HYYFQTLGKP CANDEERKKY EQEFESKWK P MAL--EGFNN DBIWAREAMV DFYADKQWV 351
OMO-86 --EHVQVEW YVPIDE--DT HEYWEILVRV CPTDEERKKY QRYDHMYK P LCL--HGFND SBLYAREAMV NFYYDGTGD 368
KshA-H37Rv YKSESLILNC HYPVTQ--NS FLQWGVIVE KPK-GMSEEM TDKLSRVFTE GVS--KGFL QVVEIWKHKT --R----IDN 316

NDO-98164 SDLLSNLGF G--EDVYGDVAV PVGVGKSAIG ETSYRGFYRA YQAHVSSSNW AEFEHASSTW HTELTKTT-- 447
NBDO-J5765 IDQIASLGF G--KDYVGYECY PGVVGKSAIG ETSYRGFYRA YQAHISSSNW AEFENASRNW HI----- 437
BPDO-B1 GRMNSTMGV G--YEGP-HPVY PGIVGIFSIG ETSYRGFYRF WKEMIDAPDW ASVKANDDNW DSVFPNRFNW NEKLNAAE-- 449
RHDO-CHY-1 GMMNSTMGV G--YEGP-HPVY PGIVGIFSIG ETSYRGFYRF WKEMIDAPDW ASVKANDDNW DSVFTNRFNW NEKLNAAE-- 448
BPDO-RHA1 RPFNAEMGL G--QTSDNPDY PGTIS--YVYS EEAARGLYTY WSRMMS PDW AALDA-TR-- 424
CUMDO-IP01 RPLCAQMAG G--VPKNNPEF PGKTS--YVYS EEAARGLYTY WSRMMS P SW DTLK--S-- 436
NDO-12038 GELNYQMGR G--VLEPDPNWTG PGEAYPLDYA EANQRNFLEY WMQLMLAES P --L----- 441
CARDO-CA10 NEILFES--D ----- -D EA-IVAWRKL ASEHNQCIQT QAHVSGLEHH H----- 389
OMO-86 DEQLVAT--D ----- -D IS--PI TWRKL ASRWNRIAK PG-RGVAGV KDTSLIFKQT ADGKRPYK 424
KshA-H37Rv -PLLVEEDGA ----- -D ----- -VYQLRRW YEQFYVDVAD IKPEMVERFE IEVDTKRANE FWNAEVEKNL 372

NDO-98164 ----- 447
NBDO-J5765 ----- 437
BPDO-B1 ----- 449
RHDO-CHY-1 ----- 448
BPDO-RHA1 ----- 424
CUMDO-IP01 ----- 436
NDO-12038 ----- 441
CARDO-CA10 ----- 389
OMO-86 EQI ----- 427
KshA-H37Rv KSREVSDDVP AEQH 386

```

Supplemental Figure 3. Structure-based sequence alignment of ROs of known structure. The ROs are identified in the legend of Supplemental Figure 4. Metal ligands are highlighted in dark grey. Other conserved residues are highlighted in light grey.

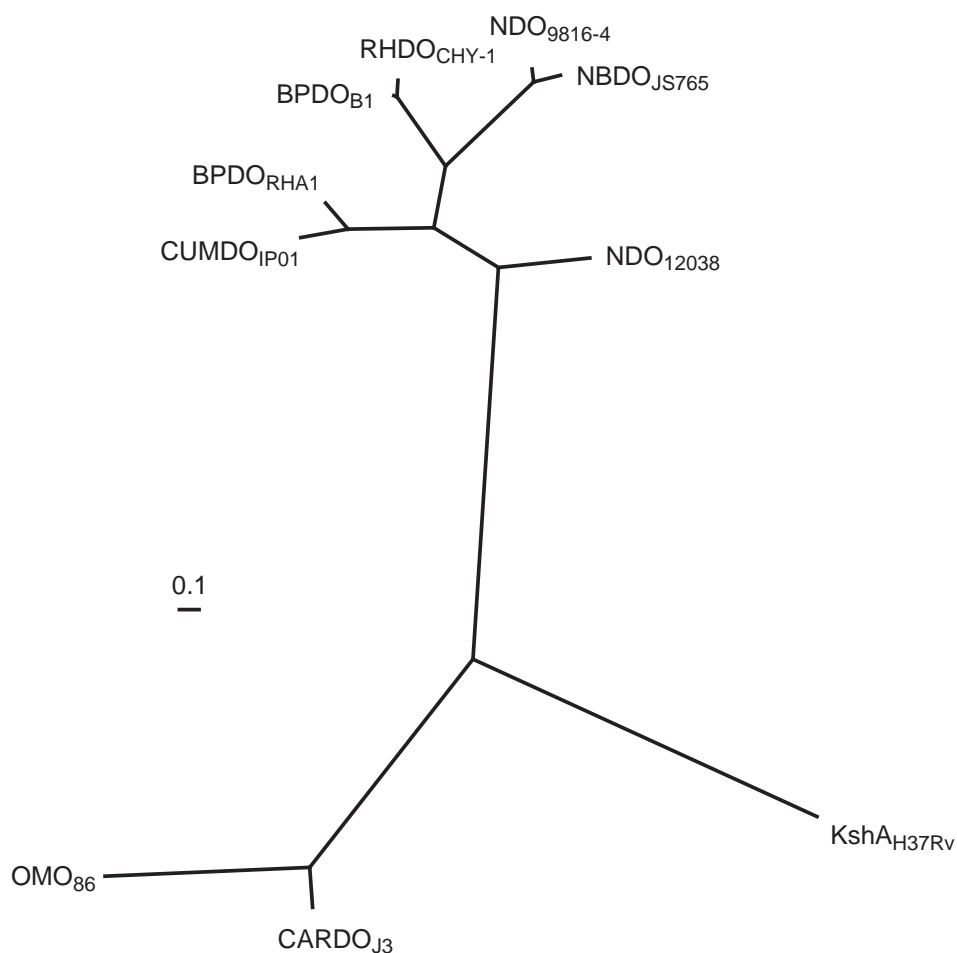

Supplemental Figure 4. Radial phylogram of structurally characterized ROs. The  $\alpha_3$  and  $\alpha_3\beta_3$  enzymes are clustered at the bottom and top of the tree, respectively. Structure-based sequence alignments were performed using: KshA<sub>H37Rv</sub> from *M. tuberculosis* H37Rv (PDB accession code 2ZYL); OMO<sub>86</sub>, 2-oxoquinoline 8-monooxygenase from *P. putida* 86 (1Z02), CARDO<sub>J3</sub>, carbazole 1,9 $\alpha$ -dioxygenase from *Janthinobacterium* sp. strain J3 (1WW9); BPDO<sub>B1</sub>, biphenyl dioxygenase from *S. yanoikuyae* B1 (2GBW); BPDO<sub>RHA1</sub> from *R. jostii* RHA1 (1ULI); NDO<sub>9816-4</sub>, naphthalene dioxygenase from *Pseudomonas* sp. strain NCIB 9816-4 (1O7W); NDO<sub>12038</sub> from *Rhodococcus* sp. strain NCIMB 12038 (2B1X); CUMDO<sub>IP01</sub>, cumene dioxygenase from *P. fluorescens* IP01 (1WQL); NBDO<sub>JS765</sub> from *Comamonas* sp. strain JS765 (2BMO); and RHDO<sub>CHY-1</sub>, ring-hydroxylating dioxygenase from *Sphingomonas* sp. strain CHY-1 (2CKF).

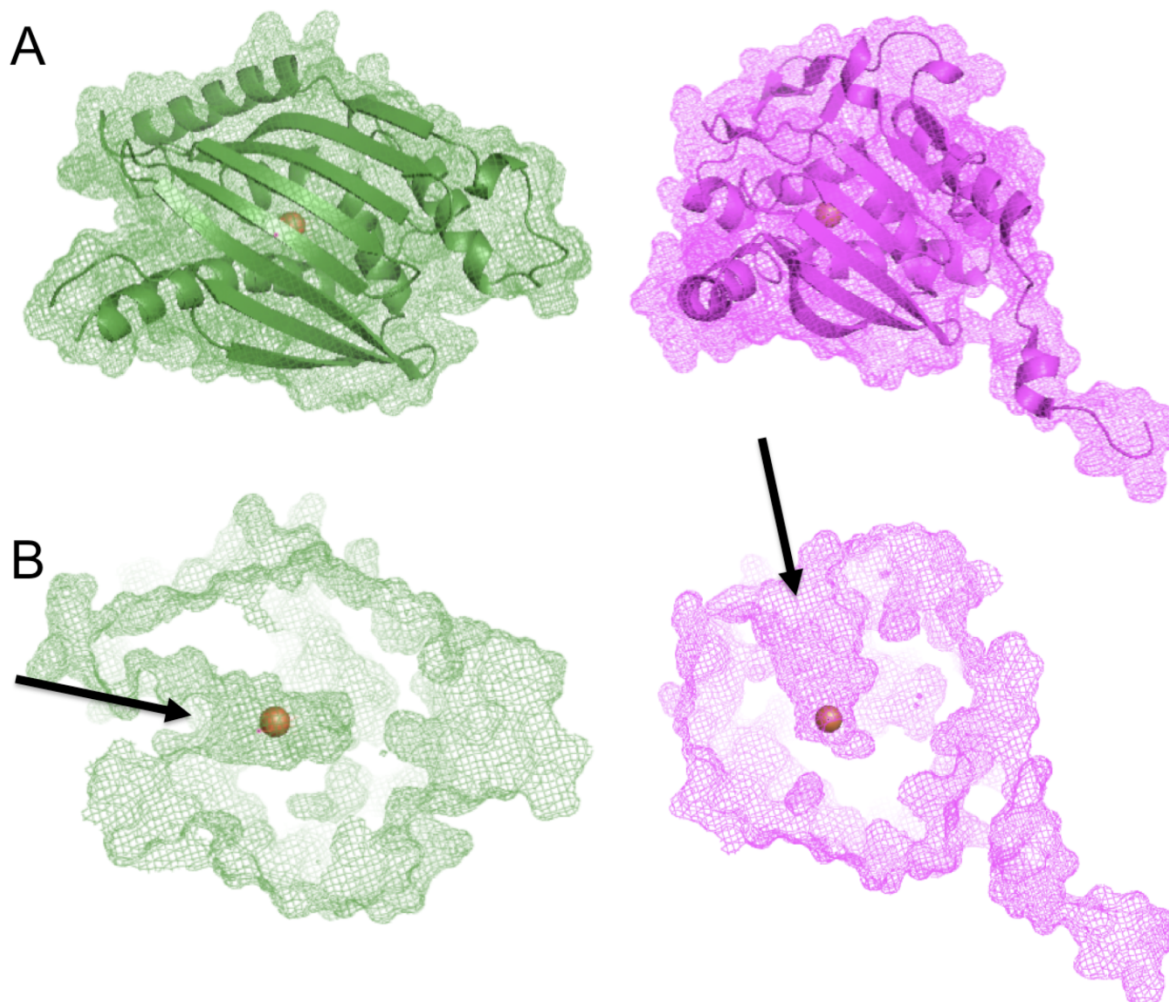

Supplemental Figure 5. Orientation of the active site channel. The catalytic domains of KshA (green) and CARDO<sub>J3</sub> (magenta) are shown in the same orientation as A) ribbon diagrams with the Connolly surface displayed as mesh, and B) cross sections of the Connolly surface. The orientation of the active site channel is indicated with a black arrow. Figures were prepared using PYMOL.

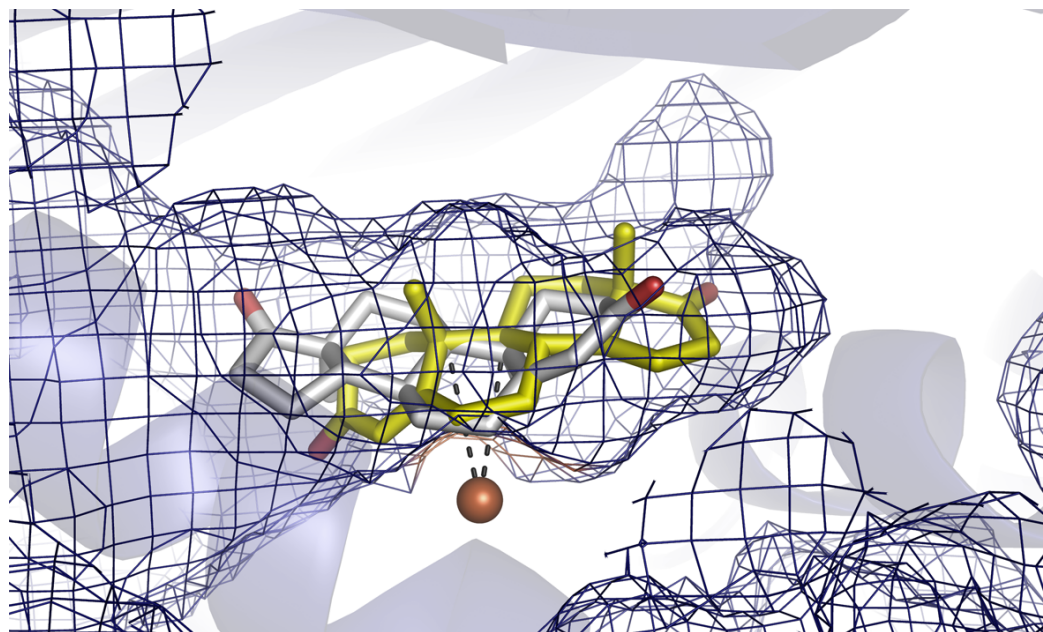

Supplemental Figure 6. Additional solution of ADD docking simulation, from the same top rmsd cluster. Two conformations of ADD docked in the active site of KshA are shown as stick representations. Carbon atoms of the two conformations are shown in magenta and grey, oxygen atoms are shown in red. The distance between the mononuclear iron and the C9 atom is 3.8 Å and 3.7 Å for the two solutions. The mononuclear iron is represented as an orange sphere. Docking simulations were performed using AutoDock. The Connolly surface of the substrate-binding pocket is represented by blue mesh. Figure generated using PYMOL.
